# Supplementary material
Source: PubMed Central journal article supplement (PMC3480987)
Supplement: NIHMS403215-supplement-Supp_Data.pdf [file NIHMS403215-supplement-Supp_Data.pdf]

# Changes in the oligomerization potential of the division inhibitor UgtP coordinate

## *Bacillus subtilis* cell size with nutrient availability

An-Chun Chien, Shannon Kian Zareh, Yan Mei Wang, and Petra Anne Levin

### Supplemental Figures

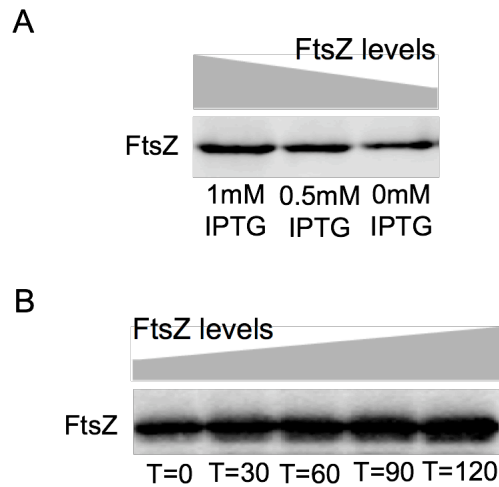

### Figure S1. Quantitative immunoblots of FtsZ depletion and over-production. (A)

The depletion of intracellular FtsZ levels in the strain PL2430 *amyE::P<sub>xyl</sub>-yfp-ugtP ftsZ::P<sub>spac</sub>-ftsZ* cultured with different amounts of the inducer IPTG. (B) The over-

production of FtsZ over a 2 hours course of induction using the strain JC115 *amyE::P<sub>spachy</sub>-yfp-ugtP thrC::P<sub>xyl</sub>-ftsZ*.

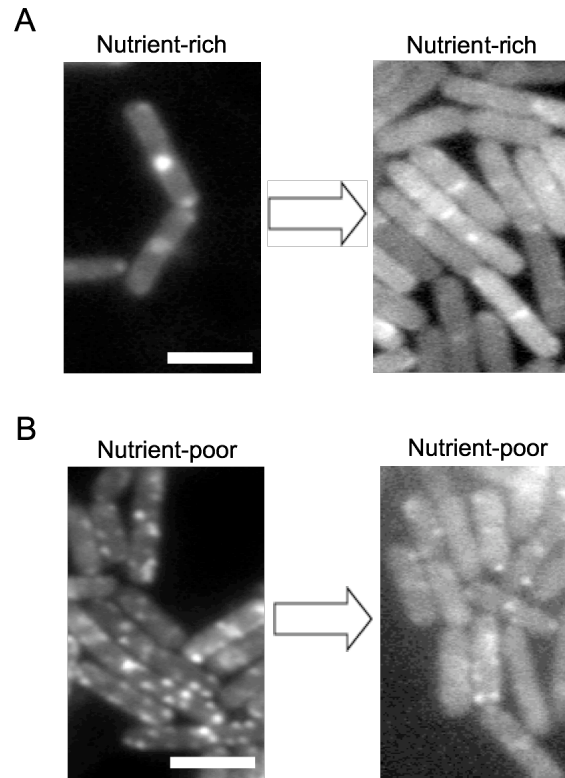

**Figure S2. Controls of nutrient shift experiments.** (A) Shifting PL2423 *amyE::P<sup>xyI</sup>-yfp-ugtP* cells from nutrient-rich LB to nutrient-rich LB in the presence of 200  $\mu\text{g ml}^{-1}$  chloramphenicol did not stimulate YFP-UgtP re-localization within 30 minutes. Bar = 3  $\mu\text{m}$ . (B) Shifting PL2423 *amyE::P<sup>xyI</sup>-yfp-ugtP* cells from nutrient-poor minimal sorbitol to nutrient-poor minimal sorbitol in the presence of 200  $\mu\text{g ml}^{-1}$  chloramphenicol did not stimulate YFP-UgtP re-localization within 30 minutes. Bar = 3  $\mu\text{m}$ . Cells were cultured at 30°C with a mass doubling time  $\sim$ 120 minutes.



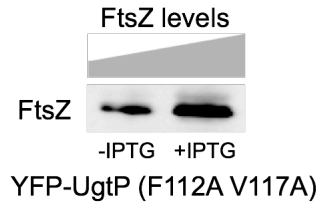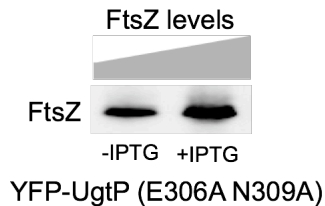

**Figure S4. Quantitative immunoblots of FtsZ over-production in strains expressing the putative UDP-glc binding mutants of YFP-UgtP.** Quantitative immunoblots of FtsZ indicating the over-production of FtsZ required for re-localization of the putative UDP-glc binding mutants of YFP-UgtP. YFP-UgtP (F112A V117A) is the putative nucleotide-binding mutant while YFP-UgtP (E306A and N309A) is the putative hexose-binding mutant. JC215 *amyE::P<sub>xyl</sub>-yfp-ugtP (F112A V117A) thrC::P<sub>spachy</sub>-ftsZ* and JC291 *amyE::P<sub>xyl</sub>-yfp-ugtP (E306A N309A) thrC::P<sub>spachy</sub>-ftsZ* cells were used.

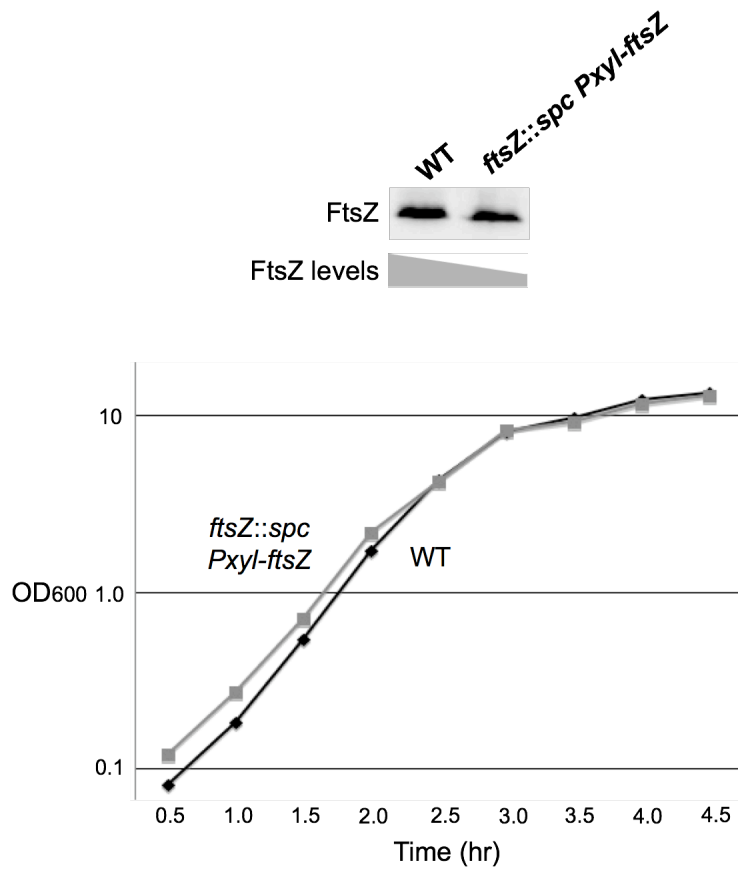

**Figure S5. Growth curves of wild type cells and partially FtsZ-depleted cells.** Top: Quantitative immunoblots indicate that PL2084 *ftsZ::spc thrC::P<sub>xyI</sub>-ftsZ* cells cultured in LB supplemented with 0.1% xylose display ~15% reduction in intracellular FtsZ levels compared to wild type cells cultured in LB. Bottom: PL2084 *ftsZ::spc thrC::P<sub>xyI</sub>-ftsZ* cells cultured in LB supplemented with 0.1% xylose display similar growth curve (gray) compared to that of wild type cells cultured in LB (black).

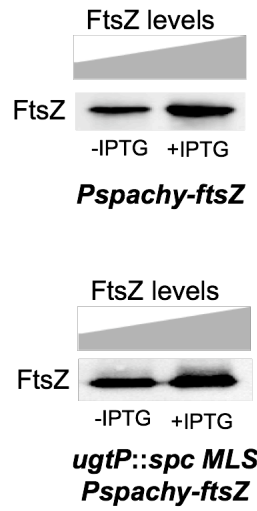

**Figure S6. Quantitative immunoblots of partial FtsZ over-production.** Quantitative immunoblots indicate the levels of FtsZ over-production (~13%) using the *amyE::P<sub>spachy-ftsZ</sub>* construct in both wild type (top) and *ugtP::spc MLS* (bottom) backgrounds

## Supplemental Tables

**Table S1. Strain table**

| Strain  | Genotype                                                                                            | Reference                          |
|---------|-----------------------------------------------------------------------------------------------------|------------------------------------|
| JH642   | <i>B. subtilis trpC2 pheA1</i>                                                                      | (Perego <i>et al.</i> , 1988)      |
| PL2292  |                                                                                                     | (Weart <i>et al.</i> , 2007)       |
| (BW503) | JH642 <i>pgcA::Tn10 cat::spc amyE::P<sub>xyl</sub>-yfp-ugtP cat</i>                                 | (Weart <i>et al.</i> , 2007)       |
| PL2430  | JH642 <i>ezrA::ezrA-cfp cat amyE::P<sub>xyl</sub>-yfp-ugtP cat::spc ftsZ::P<sub>spac</sub>-ftsZ</i> | (Weart <i>et al.</i> , 2007)       |
| (AL221) | <i>phleo</i>                                                                                        |                                    |
| JC115   | JH642 <i>amyE::P<sub>spachy</sub>-yfp-ugtP thrC::P<sub>xyl</sub>-ftsZ</i>                           | This work                          |
| JC313   | JH642 <i>amyE::P<sub>xyl</sub>-yfp-ugtP thrC::P<sub>spachy</sub>-gtaB-myc gtaB::spc</i>             | This work                          |
| JC330   | JH642 <i>amyE::P<sub>xyl</sub>-yfp-ugtP thrC::P<sub>spachy</sub>-ywfF</i>                           | This work                          |
| PL2423  |                                                                                                     | (Weart <i>et al.</i> , 2007)       |
| (AL198) | JH642 <i>amyE::P<sub>xyl</sub>-yfp-ugtP cat</i>                                                     | (Weart <i>et al.</i> , 2007)       |
| PL2295  |                                                                                                     | (Weart <i>et al.</i> , 2007)       |
| (BW507) | JH642 <i>ugtP::cat::spc erm amyE::P<sub>xyl</sub>-yfp-ugtP cat</i>                                  | This work                          |
| JC41    | JH642 <i>amyE::P<sub>xyl</sub>-yfp-ugtP(F112A V117A) cat</i>                                        | This work                          |
| JC47    | JH642 <i>ugtP::cat::spc erm amyE::P<sub>xyl</sub>-yfp-ugtP (F112A V117A) cat</i>                    | This work                          |
| JC275   | JH642 <i>amyE::P<sub>xyl</sub>-yfp-ugtP(E306A N309A) cat</i>                                        | This work                          |
| JC283   | JH642 <i>ugtP::cat::spc erm amyE::P<sub>xyl</sub>-yfp-ugtP (E306A N309A) cat</i>                    | This work                          |
| JC215   | JH642 <i>amyE::P<sub>xyl</sub>-yfp-ugtP (F112A V117A) cat thrC::P<sub>spachy</sub>-ftsZ</i>         | This work                          |
| JC291   | JH642 <i>amyE::P<sub>xyl</sub>-yfp-ugtP (E306A N309A) cat thrC::P<sub>spachy</sub>-ftsZ</i>         | This work                          |
| PL2084  |                                                                                                     |                                    |
| (BW121) | JH642 <i>ftsZ::spc xylA::tet thrC::P<sub>xyl</sub>-ftsZ</i>                                         | This work<br>(Weart & Levin, 2003) |
| PL950   | JH642 <i>amyE::P<sub>spachy</sub>-ftsZ cat</i>                                                      | This work                          |
| JC438   | JH642 <i>amyE::P<sub>spachy</sub>-ftsZ cat ugtP::cat cat::spc erm</i>                               | This work                          |

## **Supplemental Experimental Procedures**

### *Plasmid and strain construction*

Standard techniques were used for genetic manipulations. Ampicillin was used at 100  $\mu\text{g ml}^{-1}$ , chloramphenicol at 5  $\mu\text{g ml}^{-1}$ , phleomycin at 2  $\mu\text{g ml}^{-1}$ , and spectinomycin at 100  $\mu\text{g ml}^{-1}$ . MLS resistance was selected for using erythromycin at 0.5  $\mu\text{g ml}^{-1}$  and lincomycin at 12.5  $\mu\text{g ml}^{-1}$ .

### *Quantitative immunoblotting*

Mid-exponential phase cells were harvested and resuspended in 50 mM Tris pH 8.0, 1 mM EDTA, 2 mg  $\text{ml}^{-1}$  lysozyme and 1 mM AEBSF. Cells were incubated at 37°C for 15 minutes, chilled at 4°C for 15 minutes, and then lysed by the addition of sodium dodecyl sulfate (SDS). Cell lysates were normalized to  $\text{OD}_{600}$  at gel loading and subjected to SDS-polyacrylamide gel electrophoresis. FtsZ was probed using affinity purified polyclonal rabbit anti-FtsZ antibodies. Primary antibodies were used in conjunction with a goat anti-rabbit antibody conjugated to horseradish peroxidase (Jackson ImmunoResearch). Immunoblots were quantitated via chemiluminescence using a LAS1000plus imager in conjunction with ImageGauge software v3.41 (Fuji Film).



## Supplemental References

- Perego, M., G. B. Spiegelman & J. A. Hoch, (1988) Structure of the gene for the transition state regulator, *abrB*: regulator synthesis is controlled by the *spo0A* sporulation gene in *Bacillus subtilis*. *Mol Microbiol* **2**: 689-699.
- Thompson, J. D., D. G. Higgins & T. J. Gibson, (1994) CLUSTAL W: improving the sensitivity of progressive multiple sequence alignment through sequence weighting, position-specific gap penalties and weight matrix choice. *Nucleic Acids Res* **22**: 4673-4680.
- Weart, R. B., A. H. Lee, A. C. Chien, D. P. Haeusser, N. S. Hill & P. A. Levin, (2007) A metabolic sensor governing cell size in bacteria. *Cell* **130**: 335-347.
- Weart, R. B. & P. A. Levin, (2003) Growth rate-dependent regulation of medial FtsZ ring formation. *J Bacteriol* **185**: 2826-2834.
